# Supplementary material for: Exploring the Relationship Between Depressive Symptoms and Cardiovascular-Kidney-Metabolic syndrome: Evidence from the CHARLS Database
Source: Research Square preprint supplement (doi:10.21203/rs.3.rs-6267987/v1), 2025-05-07
Supplement: Supplementary file 1 [file 2aef142be07cb934896366ef.docx]

| **CKM health stages** | **Definition** |
| --- | --- |
| Stage 0: No CKM health risk factors | Individuals without overweight/obesity, metabolic risk factors (hypertension, hypertriglyceridemia, MetS, diabetes), CKD, or subclinical/clinical CVD |
| Stage 1: Excess and/or dysfunctional adiposity | Individuals with overweight/obesity, abdominal obesity, or dysfunctional adipose tissue, without the presence of other metabolic risk factors or CKD  BMI ≥25 kg/m2 (or ≥23 kg/m2 if Asian ancestry)  Waist circumference ≥88/102 cm in women/men (or if Asian ancestry, ≥80/90 cm in women/men) and/or  Fasting blood glucose ≥100–124 mg/dL or HbA1c between 5.7% and 6.4%[*](https://www.ahajournals.org/doi/10.1161/CIR.0000000000001186#fv-tab3fn2) |
| Stage 2: Metabolic risk factors and CKD | Individuals with metabolic risk factors (hypertriglyceridemia (≥135 mg/dL), hypertension, MetS[†](https://www.ahajournals.org/doi/10.1161/CIR.0000000000001186#fv-tab3fn3), diabetes) or CKD |
| Stage 3: Subclinical CVD in CKM | Subclinical ASCVD or subclinical HF among individuals with excess/dysfunctional adiposity, other metabolic risk factors, or CKD  Subclinical ASCVD to be principally diagnosed by coronary artery calcification (subclinical atherosclerosis by coronary catheterization/CT angiography also meets criteria)  Subclinical HF diagnosed by elevated cardiac biomarkers (NT-proBNP ≥125 pg/mL, high-sensitivity troponin T ≥14 ng/L for women and ≥22 ng/L for men, high-sensitivity troponin I ≥10 ng/L for women and ≥12 ng/L for men) or by echocardiographic parameters, with combination indicating highest HF risk. Risk equivalents of subclinical CVD  Very high-risk CKD (G4 or G5 CKD or very high risk per KDIGO classification)  High predicted 10-y CVD risk |
| Stage 4: Clinical CVD in CKM | Clinical CVD (coronary heart disease, heart failure, stroke, peripheral artery disease, AFib) among individuals with excess/dysfunctional adiposity, other metabolic risk factors, or CKD  Stage 4a: no kidney failure  Stage 4b: kidney failure present |

AFib indicates atrial fibrillation; ASCVD, atherosclerotic cardiovascular disease; BMI, body mass index; CKD, chronic kidney disease; CKM, cardiovascular-kidney-metabolic; CT, computed tomography; CVD, cardiovascular disease; HbA1c, hemoglobin A1c; HF, heart failure; KDIGO, Kidney Disease Improving Global Outcomes; MetS, metabolic syndrome; and NT-proBNP, N-terminal pro-B-type natriuretic peptide.

*

Individuals with gestational diabetes should receive intensified screening for impaired glucose tolerance after pregnancy.

†

MetS is defined by the presence of ≥3 of the following: (1) waist circumference ≥88 cm for women and ≥102 cm for men (if Asian ancestry, ≥80 cm for women and ≥90 cm for men), (2) high-density cholesterol <40 mg/dL for men and <50 mg/dL for women; (3) triglycerides ≥150 mg/dL; (4) elevated blood pressure (systolic blood pressure ≥130 mm Hg and/or diastolic blood pressure ≥80 mm Hg and/or use of antihypertensive medications); and (5) fasting blood glucose ≥100 mg/dL.
