# Supplementary material for: Exploring the Relationship Between Depressive Symptoms and Cardiovascular-Kidney-Metabolic syndrome: Evidence from the CHARLS Database
Source: Research Square preprint supplement (doi:10.21203/rs.3.rs-6267987/v1), 2025-05-07
Supplement: Supplementary file 2 [file aaa562b0bd70ece9d71e4390.xlsx]

## Sheet: Sheet1
Analysis	Model	Variable	OR_CI	P_value
多重插补分析	Model 1 (CESD_per_IQR)	CESD (per IQR)	1 (0.9-1.12)	0.932
多重插补分析	Model 1 (CESD_Q)	CESD Q2 vs Q1	0.96 (0.72-1.29)	0.808
多重插补分析	Model 1 (CESD_Q)	CESD Q3 vs Q1	1.18 (0.89-1.56)	0.251
多重插补分析	Model 1 (CESD_Q)	CESD Q4 vs Q1	1.07 (0.8-1.44)	0.639
多重插补分析	Model 1 (CESD_trend)	CESD trend	1.01 (0.98-1.03)	0.528
多重插补分析	Model 2 (CESD_per_IQR + 基本协变量)	CESD (per IQR)	1.14 (1-1.3)	0.043
多重插补分析	Model 2 (CESD_Q + 基本协变量)	CESD Q2 vs Q1	0.97 (0.67-1.4)	0.871
多重插补分析	Model 2 (CESD_Q + 基本协变量)	CESD Q3 vs Q1	1.1 (0.77-1.58)	0.593
多重插补分析	Model 2 (CESD_Q + 基本协变量)	CESD Q4 vs Q1	1.47 (1.01-2.13)	0.045
多重插补分析	Model 2 (CESD_trend + 基本协变量)	CESD trend	1.03 (1-1.07)	0.029
多重插补分析	Model 3 (CESD_per_IQR + 全部协变量)	CESD (per IQR)	1.21 (1.06-1.39)	0.005
多重插补分析	Model 3 (CESD_Q + 全部协变量)	CESD Q2 vs Q1	1.12 (0.76-1.65)	0.557
多重插补分析	Model 3 (CESD_Q + 全部协变量)	CESD Q3 vs Q1	1.14 (0.79-1.66)	0.488
多重插补分析	Model 3 (CESD_Q + 全部协变量)	CESD Q4 vs Q1	1.84 (1.24-2.75)	0.003
多重插补分析	Model 3 (CESD_trend + 全部协变量)	CESD trend	1.05 (1.02-1.09)	0.002
移除代谢协变量分析	Model 1 (CESD_per_IQR)	CESD (per IQR)	1.02 (0.94-1.11)	0.614
移除代谢协变量分析	Model 1 (CESD_Q)	CESD Q2 vs Q1	0.96 (0.77-1.21)	0.74
移除代谢协变量分析	Model 1 (CESD_Q)	CESD Q3 vs Q1	1.17 (0.94-1.47)	0.159
移除代谢协变量分析	Model 1 (CESD_Q)	CESD Q4 vs Q1	1.1 (0.87-1.4)	0.421
移除代谢协变量分析	Model 1 (CESD_per_IQR)	CESD (per IQR)	1.02 (0.94-1.11)	0.614
移除代谢协变量分析	Model 1 (CESD_Q)	CESD Q2 vs Q1	0.96 (0.77-1.21)	0.74
移除代谢协变量分析	Model 1 (CESD_Q)	CESD Q3 vs Q1	1.17 (0.94-1.47)	0.159
移除代谢协变量分析	Model 1 (CESD_Q)	CESD Q4 vs Q1	1.1 (0.87-1.4)	0.421
移除代谢协变量分析	Model 1 (CESD_trend)	CESD trend	1.01 (0.99-1.03)	0.245
移除代谢协变量分析	Model 2 (CESD_per_IQR + 基本协变量)	CESD (per IQR)	1.18 (1.07-1.31)	0.002
移除代谢协变量分析	Model 2 (CESD_Q + 基本协变量)	CESD Q2 vs Q1	0.92 (0.69-1.22)	0.561
移除代谢协变量分析	Model 2 (CESD_Q + 基本协变量)	CESD Q3 vs Q1	1.13 (0.85-1.5)	0.394
移除代谢协变量分析	Model 2 (CESD_Q + 基本协变量)	CESD Q4 vs Q1	1.51 (1.12-2.04)	0.007
移除代谢协变量分析	Model 2 (CESD_trend + 基本协变量)	CESD trend	1.04 (1.01-1.06)	0.003
移除代谢协变量分析	Model 3 (CESD_per_IQR + 非代谢协变量)	CESD (per IQR)	1.17 (1.06-1.3)	0.003
移除代谢协变量分析	Model 3 (CESD_Q + 非代谢协变量)	CESD Q2 vs Q1	0.96 (0.72-1.28)	0.764
移除代谢协变量分析	Model 3 (CESD_Q + 非代谢协变量)	CESD Q3 vs Q1	1.14 (0.86-1.52)	0.356
移除代谢协变量分析	Model 3 (CESD_Q + 非代谢协变量)	CESD Q4 vs Q1	1.49 (1.11-2.02)	0.009
移除代谢协变量分析	Model 3 (CESD_trend + 非代谢协变量)	CESD trend	1.04 (1.01-1.06)	0.004
